# Supplementary material
Source: PubMed Central journal article supplement (PMC5216199)
Supplement: ehw229_supp.pdf [file ehw229_supp.pdf]

**Supplemental material for d’Arcy *et al***  
**“Large-Scale Community Echocardiographic Screening Reveals a Major  
Burden of Undiagnosed Valvular Heart Disease in Older People”**

**Contents**

1. Supplemental Table 1: Results of univariate and multivariate regression
2. Supplemental Table 2: Association between smoking status and coronary heart disease
3. Supplemental Figure 1: Recruitment flowchart for the first practice to complete recruitment

**Supplemental Table 1. Results of univariate and multivariate regression.**

|                                             | Univariate Regression |         | Multivariate Regression |         |
|---------------------------------------------|-----------------------|---------|-------------------------|---------|
|                                             | OR (95% C.I.)         | P-value | OR (95% C.I.)           | P-value |
| <b>Age - 5 years increase</b>               | 1.42 (1.32,1.52)      | <0.001  | 1.37 (1.27,1.47)        | <0.001  |
| <b>Smoking Status</b>                       |                       |         |                         |         |
| Non-Smoker                                  | Reference             |         |                         |         |
| Ex-Smoker                                   | 0.93 (0.79,1.1)       | 0.404   | 0.85 (0.72,1.01)        | 0.072   |
| Smoker                                      | 0.65 (0.47,0.9)       | 0.009   | 0.66 (0.47,0.93)        | 0.018   |
| <b>Socioeconomic class</b>                  |                       |         |                         |         |
| 1 (least deprived)                          | Reference             |         |                         |         |
| 2                                           | 1.08 (0.88,1.32)      | 0.473   | 1.03 (0.84,1.27)        | 0.755   |
| 3                                           | 1.16 (0.93,1.44)      | 0.197   | 1.12 (0.89,1.41)        | 0.328   |
| 4                                           | 1.85 (1.32,2.58)      | <0.001  | 2.12 (1.50,3.01)        | <0.001  |
| 5 (most deprived)                           | 1.67 (1.07,2.61)      | 0.024   | 1.76 (1.11,2.79)        | 0.017   |
| <b>History</b>                              |                       |         |                         |         |
| Hypertension                                | 1.32 (1.13,1.55)      | <0.001  |                         |         |
| Hyperlipidaemia                             | 1.20 (1.02,1.42)      | 0.029   |                         |         |
| Atrial fibrillation                         | 2.22 (1.45,3.4)       | <0.001  | 1.85 (1.18,2.89)        | 0.007   |
| Myocardial infarction                       | 1.58 (1.1,2.28)       | 0.014   |                         |         |
| Coronary angiography                        | 1.61 (1.21,2.15)      | <0.001  |                         |         |
| Coronary artery bypass grafting             | 2.03 (1.09,3.78)      | 0.025   |                         |         |
| Stroke/TIA                                  | 1.52 (1.08,2.13)      | 0.016   |                         |         |
| <b>Medications</b>                          |                       |         |                         |         |
| ACEi/ARB                                    | 1.33 (1.12,1.57)      | 0.001   |                         |         |
| Anticoagulants                              | 2.98 (1.65,5.38)      | <0.001  |                         |         |
| Asprin                                      | 1.26 (1.04,1.53)      | 0.02    |                         |         |
| Beta blockers                               | 1.32 (1.06,1.64)      | 0.014   |                         |         |
| Diuretics                                   | 1.37 (1.11,1.69)      | 0.003   |                         |         |
| Lipid lowering agents                       | 1.22 (1.04,1.44)      | 0.018   |                         |         |
| Nitrates                                    | 1.5 (1.04,2.15)       | 0.03    |                         |         |
| <b>Examination</b>                          |                       |         |                         |         |
| Heart rate - 10 bpm increase                | 0.85 (0.8,0.91)       | <0.001  | 0.86 (0.80,0.92)        | <0.001  |
| Diastolic blood pressure - 10 mmHg increase |                       |         | 0.90 (0.82,0.99)        | 0.027   |
| Systolic blood pressure – 10 mmHg increase  | 1.09 (1.04,1.13)      | <0.001  | 1.12 (1.06,1.19)        | <0.001  |
| BMI - 1 kg/m <sup>2</sup> increase          | 0.97 (0.96,0.99)      | 0.002   | 0.98 (0.96,0.99)        | 0.011   |

The outcome variable was a new diagnosis of valvular heart disease. Results are presented as odds ratios (OR) of the logistic regression with corresponding 95% confidence interval

(CI). P-value tests whether each OR is different from 1 and is obtained from the  $\chi^2$  distribution with 1 degree of freedom. The threshold for inclusion in multivariate regression was  $p < 0.10$  on univariate regression. ACEi = angiotensin converting enzyme inhibitor. ARB = angiotensin receptor blocker. BMI = body mass index. bpm = beats per minute. SEC = socioeconomic class. TIA = transient ischaemic attack.

**Supplemental Table 2. Association between coronary heart disease and smoking status.**

|                       | <b>Number (%) with<br/>coronary heart disease</b> |
|-----------------------|---------------------------------------------------|
| <b>Smoking status</b> |                                                   |
| Non-smoker            | 108 (8.8%)                                        |
| Ex-smoker             | 168 (15.4%)                                       |
| Current smoker        | 19 (10.9%)                                        |

Coronary heart disease refers to any history of angina, myocardial infarction, percutaneous coronary intervention or coronary artery bypass surgery. The difference between groups was statistically significant ( $X^2$   $p < 0.001$ ).

**Supplemental Figure 1. Recruitment flow chart for the first practice to complete recruitment.**

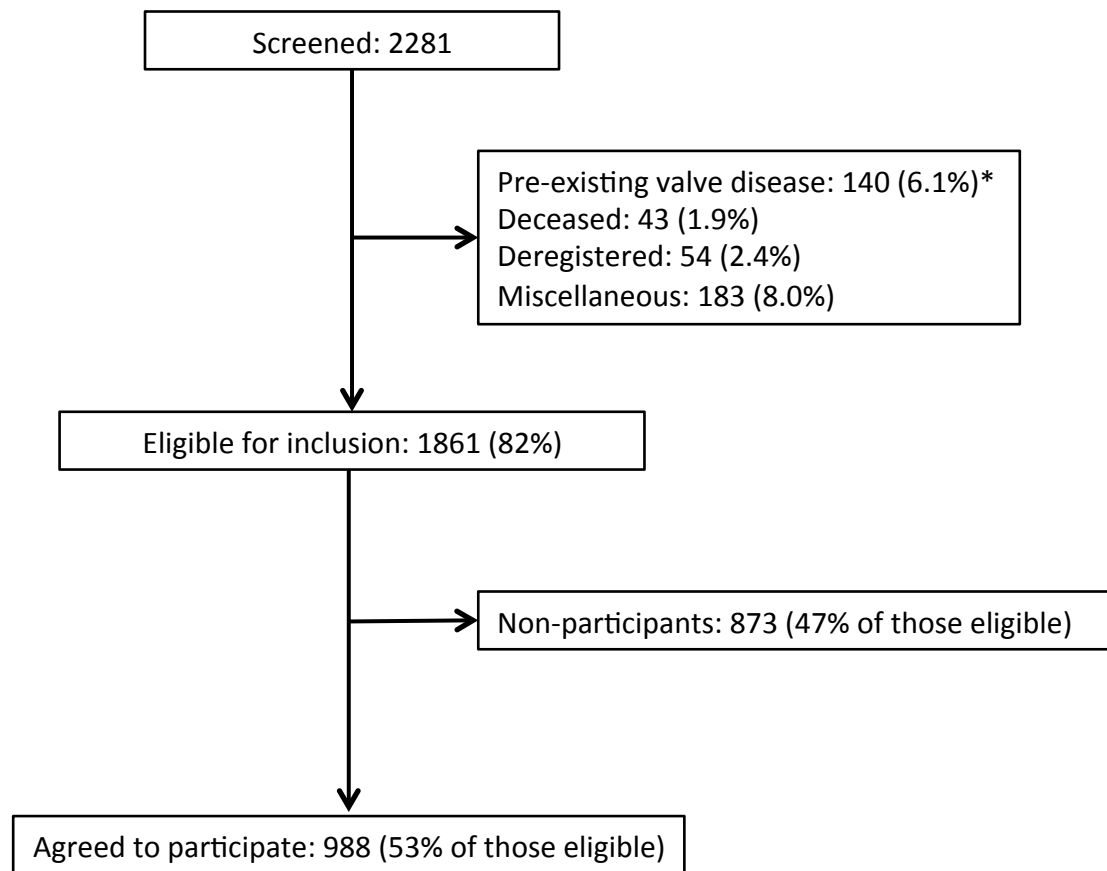

\*All available data indicating a prior history of valvular heart disease (VHD) were used to estimate the overall population prevalence, as reported in the main manuscript. Amongst the 140 individuals with pre-existing VHD, 11 (0.4% of the total potential population) had undergone valve surgery (aortic valve replacement n=9, mitral valve replacement n=1, unspecified valve surgery n=1).
